# Supplementary material
Source: publisher site journal article supplement (https://www.dovepress.com/get_supplementary_file.php?f=365496.docx)
Supplement: Supplementary file 1 [file get_supplementary_file.php]

| **Supplementary table 1.** Maximal exercise capacity. | | |  | | |
| --- | --- | --- | --- | --- | --- |
| **Parameters** | **CTL EX** | **T2D EX** | | **P value** |
| Vpeak (m/min) | 22.00 ± 3.74 | 15.47 ± 3.8 | | <.001 |
| Vsession (m/min) | 17.21 ± 3.18 | 12.06 ± 2.92 | | <.001 |
| Time to exaustion (min) | 13.44 ± 3.59 | 6.53 ± 4.20 | | <.001 |
